# Supplementary material for: Treatment Outcomes in Anaplastic Thyroid Cancer
Source: PubMed Central journal article supplement (PMC6556325; doi:10.1155/2019/8218949), 2019-05-23
Supplement: 8218949.f1.pdf [file 8218949.f1.pdf]

## SUPPLEMENTARY MATERIALS

**Supplementary Table 1:** Treatment characteristics for all patients who underwent EBRT

|                      | All courses<br>(N=34)    | First course<br>(N=21)   | Second course<br>(N=9)   | Third course<br>(N=3)    | Fourth course<br>(N=1)   |
|----------------------|--------------------------|--------------------------|--------------------------|--------------------------|--------------------------|
| EBRT intent          |                          |                          |                          |                          |                          |
| Curative             | 11 (32.4%)               | 7 (33.3%)                | 3 (33.3%)                | 1 (33.3%)                | 0 (0.0%)                 |
| Palliative           | 23 (67.6%)               | 14 (66.7%)               | 6 (66.7%)                | 2 (66.7%)                | 1 (100.0%)               |
| EBRT type            |                          |                          |                          |                          |                          |
| 2D                   | 10 (29.4%)               | 5 (23.8%)                | 4 (44.4%)                | 1 (33.3%)                | 0 (0.0%)                 |
| 3D conformal         | 3 (8.8%)                 | 3 (14.3%)                | 0 (0.0%)                 | 0 (0.0%)                 | 0 (0.0%)                 |
| IMRT/VMAT            | 17 (50.0%)               | 11 (52.4%)               | 5 (55.6%)                | 1 (33.3%)                | 0 (0.0%)                 |
| SBRT                 | 1 (2.9%)                 | 0 (0.0%)                 | 0 (0.0%)                 | 1 (33.3%)                | 0 (0.0%)                 |
| SRS                  | 1 (2.9%)                 | 0 (0.0%)                 | 0 (0.0%)                 | 0 (0.0%)                 | 1 (100.0%)               |
| Unknown              | 2 (5.9%)                 | 2 (9.5%)                 | 0 (0.0%)                 | 0 (0.0%)                 | 0 (0.0%)                 |
| Site(s) of treatment |                          |                          |                          |                          |                          |
| Thyroid/Thyroid bed  | 26 (76.5%)               | 18 (85.7%)               | 6 (66.7%)                | 2 (66.7%)                | 0 (0.0%)                 |
| Left neck            | 21 (61.8%)               | 16 (76.2%)               | 4 (44.4%)                | 1 (33.3%)                | 0 (0.0%)                 |
| Right neck           | 22 (64.7%)               | 16 (76.2%)               | 5 (55.6%)                | 1 (33.3%)                | 0 (0.0%)                 |
| Mediastinum          | 6 (17.6%)                | 3 (14.3%)                | 3 (33.3%)                | 0 (0.0%)                 | 0 (0.0%)                 |
| Metastases           | 7 (20.6%)                | 2 (9.5%)                 | 3 (33.3%)                | 1 (33.3%)                | 1 (100.0%)               |
| Other                | 2 (5.9%)                 | 1 (4.8%)                 | 1 (11.1%)                | 0 (0.0%)                 | 0 (0.0%)                 |
| Number of fractions  |                          |                          |                          |                          |                          |
| Median (IQR)         | 14.0 (10.0 - 23.0)       | 17.0 (11.0 - 27.0)       | 10.0 (10.0 - 17.0)       | 11.0 (3.0 - 18.0)        | 1.0 (1.0 - 1.0)          |
| Total dose (cGy)     |                          |                          |                          |                          |                          |
| Median (IQR)         | 3000.0 (2100.0 - 3880.0) | 3500.0 (2500.0 - 4500.0) | 2690.0 (1750.0 - 3000.0) | 2000.0 (1800.0 - 3600.0) | 5900.0 (5900.0 - 5900.0) |
| RT course completion |                          |                          |                          |                          |                          |
| Completed            | 27 (79.4%)               | 15 (71.4%)               | 8 (88.9%)                | 3 (100.0%)               | 1 (100.0%)               |

|                                        | All courses<br>(N=34) | First course<br>(N=21) | Second course<br>(N=9) | Third course<br>(N=3) | Fourth course<br>(N=1) |
|----------------------------------------|-----------------------|------------------------|------------------------|-----------------------|------------------------|
| Discontinued early due to toxicity     | 3 (8.8%)              | 3 (14.3%)              | 0 (0.0%)               | 0 (0.0%)              | 0 (0.0%)               |
| Discontinued early due to other reason | 2 (5.9%)              | 2 (9.5%)               | 0 (0.0%)               | 0 (0.0%)              | 0 (0.0%)               |
| In-field recurrence                    |                       |                        |                        |                       |                        |
| No                                     | 23 (67.6%)            | 14 (66.7%)             | 5 (55.6%)              | 3 (100.0%)            | 1 (100.0%)             |
| Yes                                    | 8 (23.5%)             | 6 (28.6%)              | 2 (22.2%)              | 0 (0.0%)              | 0 (0.0%)               |
| Unknown                                | 2 (5.9%)              | 0 (0.0%)               | 2 (22.2%)              | 0 (0.0%)              | 0 (0.0%)               |

**Supplementary Table 2.** Treatment characteristics for patients who underwent EBRT to the thyroid/thyroid bed/neck

|                      | All courses<br>(N=29) | First course<br>(N=19) | Second course<br>(N=8) | Third course<br>(N=2) |
|----------------------|-----------------------|------------------------|------------------------|-----------------------|
| EBRT intent          |                       |                        |                        |                       |
| Curative             | 10 (34.5%)            | 7 (36.8%)              | 3 (37.5%)              | 0 (0.0%)              |
| Palliative           | 19 (65.5%)            | 12 (63.2%)             | 5 (62.5%)              | 2 (100.0%)            |
| EBRT type            |                       |                        |                        |                       |
| 2D                   | 9 (31.0%)             | 5 (26.3%)              | 3 (37.5%)              | 1 (50.0%)             |
| 3D conformal         | 3 (10.3%)             | 3 (15.8%)              | 0 (0.0%)               | 0 (0.0%)              |
| IMRT/VMAT            | 15 (51.7%)            | 9 (47.4%)              | 5 (62.5%)              | 1 (50.0%)             |
| Unknown              | 2 (6.9%)              | 2 (10.5%)              | 0 (0.0%)               | 0 (0.0%)              |
| Site(s) of treatment |                       |                        |                        |                       |
| Thyroid/Thyroid bed  | 26 (89.7%)            | 18 (94.7%)             | 6 (75.0%)              | 2 (100.0%)            |
| Left neck            | 21 (72.4%)            | 16 (84.2%)             | 4 (50.0%)              | 1 (50.0%)             |
| Right neck           | 22 (75.9%)            | 16 (84.2%)             | 5 (62.5%)              | 1 (50.0%)             |
| Number of fractions  |                       |                        |                        |                       |
| Median (IQR)         | 16.0 (10.0 - 24.0)    | 19.0 (12.0 - 30.0)     | 10.0 (10.0 - 20.0)     | 14.5 (11.0 - 18.0)    |

|                                        | <b>All courses<br/>(N=29)</b> | <b>First course<br/>(N=19)</b> | <b>Second course<br/>(N=8)</b> | <b>Third course<br/>(N=2)</b> |
|----------------------------------------|-------------------------------|--------------------------------|--------------------------------|-------------------------------|
| Total dose (cGy)                       |                               |                                |                                |                               |
| Median (IQR)                           | 3000.0 (2100.0 - 3880.0)      | 3550.0 (2450.0 - 4500.0)       | 2380.0 (1500.0 - 3000.0)       | 2800.0 (2000.0 - 3600.0)      |
| RT course completion                   |                               |                                |                                |                               |
| Completed                              | 22 (75.9%)                    | 13 (68.4%)                     | 7 (87.5%)                      | 2 (100.0%)                    |
| Discontinued early due to toxicity     | 3 (10.3%)                     | 3 (15.8%)                      | 0 (0.0%)                       | 0 (0.0%)                      |
| Discontinued early due to other reason | 2 (6.9%)                      | 2 (10.5%)                      | 0 (0.0%)                       | 0 (0.0%)                      |
| In-field recurrence                    |                               |                                |                                |                               |
| No                                     | 20 (69.0%)                    | 13 (68.4%)                     | 5 (62.5%)                      | 2 (100.0%)                    |
| Yes                                    | 7 (24.1%)                     | 5 (26.3%)                      | 2 (25.0%)                      | 0 (0.0%)                      |
| Unknown                                | 1 (3.4%)                      | 0 (0.0%)                       | 1 (12.5%)                      | 0 (0.0%)                      |

Counts and column percentages are presented unless otherwise specified.

EBRT = External beam radiation therapy; IMRT = Intensity modulated radiation therapy; VMAT = Volumetric modulated arc therapy; RT = Radiotherapy.

**Supplementary Figure 1: Recurrence-free survival for patients who underwent EBRT versus no EBRT**

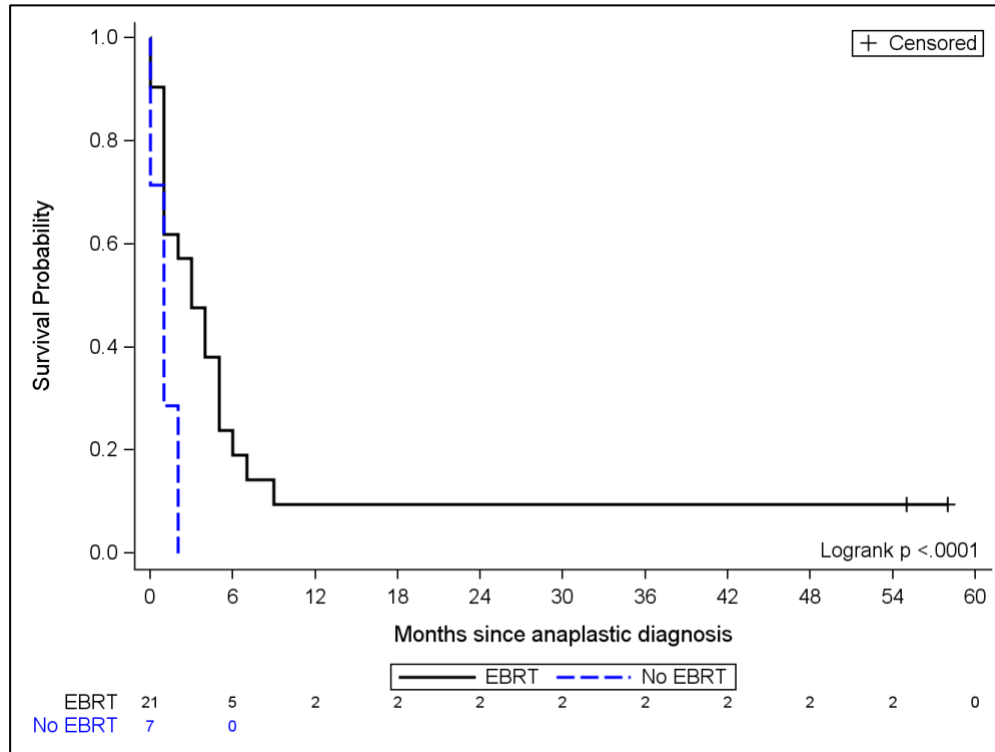

|         | Total | Events   | Censored | 1-Year Survival Rate (95% CI) | Median Survival (months) (95% CI) |
|---------|-------|----------|----------|-------------------------------|-----------------------------------|
| EBRT    | 21    | 19 (90%) | 2 (10%)  | 0.095 (0.016 - 0.261)         | 3.0 (1.0 - 5.0)                   |
| No EBRT | 7     | 7 (100%) | 0 (0%)   |                               | 1.0 (0.0 - 2.0)                   |
| Total   | 28    | 26 (93%) | 2 (7%)   |                               |                                   |

**Supplementary Figure 2: Overall survival for all patients according to treatment regimen**

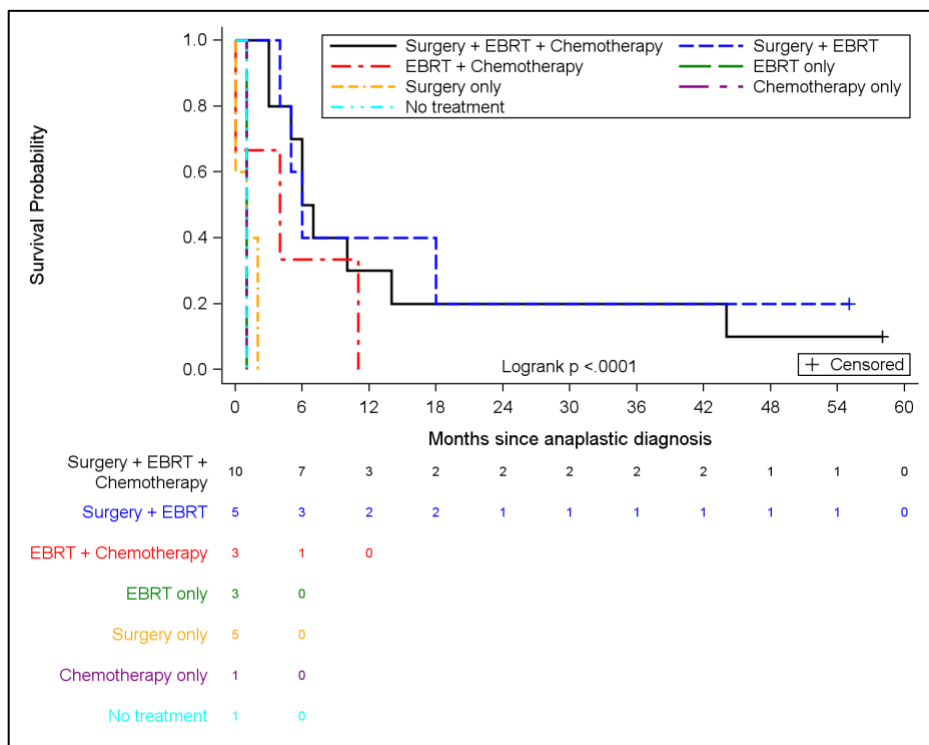

|                               | Total | Deaths   | Censored | 1-Year Survival Rate (95% CI) | Median Survival (months) (95% CI) |
|-------------------------------|-------|----------|----------|-------------------------------|-----------------------------------|
| Surgery + EBRT + Chemotherapy | 10    | 9 (90%)  | 1 (10%)  | 0.300 (0.071 - 0.578)         | 6.5 (3.0 - 14.0)                  |
| Surgery + EBRT                | 5     | 4 (80%)  | 1 (20%)  | 0.400 (0.052 - 0.753)         | 6.0 (4.0 - NE)                    |
| EBRT + Chemotherapy           | 3     | 3 (100%) | 0 (0%)   |                               | 4.0 (0.0 - 11.0)                  |
| EBRT only                     | 3     | 3 (100%) | 0 (0%)   |                               | 1.0 (NE - NE)                     |
| Surgery only                  | 5     | 5 (100%) | 0 (0%)   |                               | 1.0 (0.0 - 2.0)                   |
| Chemotherapy only             | 1     | 1 (100%) | 0 (0%)   |                               | 1.0 (NE - NE)                     |
| No treatment                  | 1     | 1 (100%) | 0 (0%)   |                               | 1.0 (NE - NE)                     |
| Total                         | 28    | 26 (93%) | 2 (7%)   |                               |                                   |

NE = Non-evaluable
